# Supplementary material
Source: PubMed Central journal article supplement (PMC2678467)
Supplement: 0810764106_0810764106SI.pdf [file 0810764106_0810764106SI.pdf]

# Supporting Information

Chameau et al. 10.1073/pnas.0810764106

Table S1. Absolute values of the dendritic complexity index (DCI) under the various experimental conditions

| Dendritic tree | Experimental condition     | DCI ( $\pm$ SEM)      | <i>n</i> |
|----------------|----------------------------|-----------------------|----------|
| apical         | Control                    | 55,699 $\pm$ 8961     | 29       |
|                | Tropisetron                | 247,757 $\pm$ 52,874* | 39       |
| basal          | Control                    | 10,312 $\pm$ 1650     | 17       |
|                | Tropisetron                | 11,184 $\pm$ 1795     | 32       |
| apical         | Control                    | 17281 $\pm$ 3032      | 32       |
|                | KO                         | 26,914 $\pm$ 3230*    | 26       |
| apical         | Control                    | 43,113 $\pm$ 12,132   | 5        |
|                | G10                        | 172,942 $\pm$ 47,334* | 9        |
| basal          | Control                    | 16,230 $\pm$ 3406     | 5        |
|                | G10                        | 13,842 $\pm$ 2834     | 9        |
| apical         | Control                    | 68,534 $\pm$ 16,801   | 9        |
|                | G10 + tropisetron          | 333,505 $\pm$ 64,577* | 12       |
| basal          | Control                    | 16,044 $\pm$ 3298     | 11       |
|                | G10 + tropisetron          | 15,522 $\pm$ 2998     | 9        |
| apical         | Control                    | 37,878 $\pm$ 7256     | 6        |
|                | Tropisetron + reelin       | 46,331 $\pm$ 7906     | 7        |
|                | Tropisetron + reelin + G10 | 165,220 $\pm$ 68,016* | 6        |
|                | Control                    | 56,258 $\pm$ 6182     | 54       |
|                | KO                         | 131,517 $\pm$ 28,677* | 20       |
|                | KO + reelin                | 53,482 $\pm$ 10,316   | 6        |
|                | Control                    | 112,050 $\pm$ 18,853  | 10       |
|                | R4B                        | 123,811 $\pm$ 21,675  | 15       |
|                | R5A                        | 92,775 $\pm$ 27,168   | 7        |
|                | Control                    | 54,172 $\pm$ 8918     | 11       |
|                | Tropisetron + NR2          | 49,709 $\pm$ 16,875   | 11       |
|                | Control                    | 42,745 $\pm$ 10,236   | 10       |
|                | Tropisetron + R3–6         | 146,184 $\pm$ 34,319* | 16       |
|                | Control                    | 81,301 $\pm$ 25,512   | 14       |
|                | RAP                        | 89,720 $\pm$ 15,752   | 12       |
|                | Control                    | 87,089 $\pm$ 23,078   | 20       |
|                | Echistatin                 | 326,075 $\pm$ 77,376* | 11       |

Asterisks indicate significant difference as compared with control ( $P < 0.05$ ).
